Expression of Concern

# Expression of Concern: Circular RNA hsa\_circ\_0072309 inhibits non-small cell lung cancer progression by sponging miR-580-3p

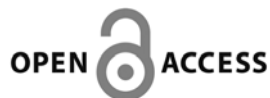

The Editorial Office has been made aware of potential issues surrounding the scientific validity of this paper, hence has issued an expression of concern to notify readers whilst the Editorial Office investigates.

Version of Record published:  
24 June 2020
